# Supplementary material for: Specific elastin degradation products are associated with poor outcome in the ECLIPSE COPD cohort
Source: PubMed Central journal article supplement (PMC6412140; doi:10.1038/s41598-019-40785-2), 2019-03-11
Supplement: 41598_2019_40785_MOESM1_ESM.pdf [file 41598_2019_40785_MOESM1_ESM.pdf]

## Elastin degradation is not just elastin degradation: Results from 5 different biomarkers of elastin in the ECLIPSE cohort

**Authors:** Sarah Rank Rønnow<sup>1,2\*</sup>, MSc; Lasse Løkke Langholm<sup>1,3</sup>, MSc; Jannie Marie Bülow Sand<sup>1</sup>, PhD; Jeppe Thorlacius-Ussing<sup>1</sup>, BSc; Diana Julie Leeming<sup>1</sup>, PhD; Tina Manon-Jensen<sup>1</sup>, PhD; Ruth Tal-Singer<sup>4</sup>, PhD; Bruce E. Miller<sup>4</sup>, PhD; Morten Asser Karsdal<sup>1</sup>, PhD; and Jørgen Vestbo<sup>5</sup>, MD

The Evaluation of COPD Longitudinally to Identify Surrogate Endpoints (ECLIPSE) study, investigators.

<sup>1</sup>Nordic Bioscience A/S, Herlev, Denmark, <sup>2</sup>University of Southern Denmark, The Faculty of Health Science, Odense, Denmark, <sup>3</sup>University of Copenhagen, <sup>4</sup>GSK R&D, Collegeville, PA, USA, <sup>5</sup>Division of Infection Immunity and Respiratory Medicine, The University of Manchester, Manchester Academic Health Science Centre, and Manchester University NHS Foundation Trust, Manchester, England.

\*Correspondence to [sar@nordicbio.com](mailto:sar@nordicbio.com)

## Supplementary

**Table 1. Ethics and review boards**

| Inv/Site No.   | Institution & Address                                                                                                                               | IEC/IRB Committee                                                                                                                                                              |
|----------------|-----------------------------------------------------------------------------------------------------------------------------------------------------|--------------------------------------------------------------------------------------------------------------------------------------------------------------------------------|
| 027904/023622  | Asthma Centre<br>Ivan Vazov Street Nr 31<br>PO Box 1018<br>Pleven, 5800 Bulgaria                                                                    | Ethics Committee for Multicentre Trials<br>8, Damyan Gruev str.,<br>Sofia 1303<br>Bulgaria                                                                                     |
| 076209/023623  | Military Medical Academy<br>Georgi Sofiiski 3 str<br>Sofia 1606 Bulgaria                                                                            | Ethics Committee for Multicentre Trials<br>8, Damyan Gruev str.,<br>Sofia 1303<br>Bulgaria                                                                                     |
| 006269/023794  | Montreal Chest Institute<br>3650 St-Urbain, Room K307<br>Montreal, QC H2X 2P4 Canada                                                                | McGill University Health Center<br>Research Ethics Board<br>3650 St Urbain<br>Montreal, QC H2X 2P4                                                                             |
| 006610/023668  | The Lung Center<br>2775 Laurel St., 7 <sup>th</sup> Floor<br>Vancouver, BC V5Z 1M9 Canada                                                           | The University of British Columbia<br>Office of Research Services Clinical Research<br>Ethics Board<br>Room210, 828 West 10 <sup>th</sup> Ave<br>Vancouver, BC V5Z 1L8 Canada  |
| 004970/023483  | Queen Elizabeth II Health Sciences Centre<br>Halifax Infirmary<br>1796 Summer St., Room 5452<br>Halifax, NS B3H 3A7 Canada                          | Capital Health Research Ethics Board<br>Centre for Clinical Research Building<br>118-5790 University Avenue<br>Halifax, NS B3H 1V7 Canada                                      |
| 029347/023796  | McMaster University, Health Sciences Center<br>1200 Main St. West, Room 3U25<br>Hamilton, ON L8N 3Z5 Canada                                         | Hamilton Health Sciences/Faculty of Health<br>Sciences Research Ethics Board<br>293 Wellington St N,<br>Suite 102<br>Hamilton, Ontario L8L 8E7<br>Canada                       |
| 035031/023795  | Pacific Lung Health Center<br>1081 Burrard Street<br>8B Providence Wing<br>Vancouver, BC V6Z 1Y6 Canada                                             | Office of Research Services (ORS)<br>Providence Health Care Research Institute<br>Room 1125, 11th Floor<br>1190 Hornby Street c/o 1081 Burrard Street<br>Vancouver, BC V6Z 1Y6 |
| 006193/023547  | Hopital Laval, Recherche Clinique<br>Centre de Pneumologie<br>2725 Chemin Sainte Foy<br>Pavillion U, Locale U 1751<br>Sainte Foy, QC G1V 4G5 Canada | Comité d'éthique de la recherche<br>Institut Universitaire de Cardiologie et de<br>Pneumologie de Québec (IUCPQ)<br>2725, chemin Ste-Foy<br>Quebec, Qc<br>Canada<br>G1V 4G5    |
| 004395/02409 4 | Kingston General Hospital<br>Richardson House<br>102 Stuart Street<br>Kingtson, ON K7L 2V6 Canada                                                   | Queens University<br>Office of Research Services<br>Fleming Hall, Jemmett Wing, Room 301<br>Queens University<br>Kingston, ON, Canada                                          |
| 000309/024204  | SPLiN s.r.o.<br>Oddeleni TRN<br>Cimicka 37/446<br>Praha 8 18200 Czech Republic                                                                      | Multicentric Ethics Committee Fakultni<br>nemocnice v Motole<br>V Uvalu 84 Prague 5 ZIP: 150 06<br>Czech Republic                                                              |
| 000683/023960  | H:S Hvidovre Hospital<br>Hjerte-Lungemedicinsk afdeling<br>Kettegaard Alle 30<br>Opgang 1<br>Hvidovre 2650 Denmark                                  | Den videnskabetiske komité for region<br>hovedstaden<br>Regionsgaarden<br>Kongensvænge 2<br>3400 Hillerød                                                                      |
| 001687/024403  | Astmacentrum Hornerheide<br>Hornerheide 1<br>Horn 6085 NM Netherlands                                                                               | METC Zuidwest-Holland<br>M.H.H.A. Kirkels-Breukers<br>P.O Box 5011<br>2600 GA Delft<br>The Netherlands                                                                         |

|               |                                                                                                                                                                     |                                                                                                                                                                                                                                                               |
|---------------|---------------------------------------------------------------------------------------------------------------------------------------------------------------------|---------------------------------------------------------------------------------------------------------------------------------------------------------------------------------------------------------------------------------------------------------------|
| 082272/023579 | Haukeland Universitets sykehus<br>Chest department<br>Jonas Liesvei 65<br>Bergen N 5021 Norway                                                                      | Regional Ethic Committee West<br>Haukeland University Hospital, N-5021 Bergen,<br>Norway                                                                                                                                                                      |
| 014566/024144 | P3 Research Bown Hospital<br>Churchill Drive Crofton Downs<br>Wellington 6035 New Zealand                                                                           | c/- Ministry of Health<br>1-3 The Terrace<br>Level 1<br>Wellington<br>6011                                                                                                                                                                                    |
| 136098/024146 | KOPA Golnik<br>Golnik 36<br>4204 Golnik Slovenia                                                                                                                    | The National Medical Ethics Committee of the<br>Republic of Slovenia<br>University Institute of Clinical Neurophysiology,<br>Medical Center Ljubljana,<br>Zaloška c. 7,<br>SI-1525 Ljubljana                                                                  |
| 108244/026658 | Hospital Son Dureta<br>C/ Andrea Doria 55<br>Palma de Mallorca 07014 Spain                                                                                          | Comité ètic d'investigació clínica Illes Balears<br>Conselleria de Salut i Consum<br>Direcció General d'Avaluació i Acreditació<br>Comitè Ètic d'Investigació Clínica de les Illes<br>Balears (CEIC-IB)<br>Camí de Jesús, 38 A<br>07011 Palma - Illes Balears |
| 000473/023973 | Aintree University Hospitals NHS Foundation<br>Trust<br>Respiratory Research Department<br>Longmoor Lane, Ward 14a<br>Liverpool L9 7AL United Kingdom               | Oxfordshire REC C<br>2 <sup>nd</sup> Floor, Astral House<br>Chaucer Business Park<br>Granville Way<br>Bicester OX26 4JT                                                                                                                                       |
| 082424/023706 | Cambridge Institute for Medical Research<br>Department of Medicine<br>Hills Road, Wellcome Trust / MRC Building<br>Cambridge CB2 2XY United Kingdom                 | Oxfordshire REC C<br>2 <sup>nd</sup> Floor, Astral House<br>Chaucer Business Park<br>Granville Way<br>Bicester OX26 4JT                                                                                                                                       |
| 029855/023707 | New Royal Infirmary of Edinburgh<br>Little France Crescent, Old Dalkeith Road<br>51 Little France Crescent<br>Edinburgh Midlothian EH16 4SA<br>United Kingdom       | Oxfordshire REC C<br>2 <sup>nd</sup> Floor, Astral House<br>Chaucer Business Park<br>Granville Way<br>Bicester OX26 4JT                                                                                                                                       |
| 023731/023974 | Wythenshawe Hospital<br>Medicine Evaluation Unit<br>Southmoor Road<br>The Langley Building, North West Lung<br>Research Centre<br>Manchester M23 9LT United Kingdom | Oxfordshire REC C<br>2 <sup>nd</sup> Floor, Astral House<br>Chaucer Business Park<br>Granville Way<br>Bicester OX26 4JT                                                                                                                                       |
| 029742/024037 | The Royal Free Hospital<br>Academic Unit of Respiratory Medicine<br>Pond Street<br>London NW3 2QG United Kingdom                                                    | Oxfordshire REC C<br>2 <sup>nd</sup> Floor, Astral House<br>Chaucer Business Park<br>Granville Way<br>Bicester OX26 4JT                                                                                                                                       |
| 001069/024393 | Institute of Phthisiatry and Pulmonology<br>Department of Pulmonology<br>10, Amosova Str<br>Kiev 03680 Ukraine                                                      |                                                                                                                                                                                                                                                               |
| 001047/024392 | Institute of Phthisiatry and Pulmonology<br>Department of Pulmonology<br>10, Amosova Str<br>Kiev 03680 Ukraine                                                      |                                                                                                                                                                                                                                                               |
| 001071/024362 | Institute of Phthisiatry and Pulmonology<br>Department of Pulmonology<br>10, Amosova Str<br>Kiev 03680 Ukraine                                                      |                                                                                                                                                                                                                                                               |
| 001063/024364 | Donetsk State Medical University<br>Department of Therapy<br>16 Illicha prospect<br>Donetsk 83003 Ukraine                                                           |                                                                                                                                                                                                                                                               |

|                |                                                                                                                                                                                |                                                                                                                                                                          |
|----------------|--------------------------------------------------------------------------------------------------------------------------------------------------------------------------------|--------------------------------------------------------------------------------------------------------------------------------------------------------------------------|
| 044783/023140  | University of Texas Health Science Center<br>Pulmonary Diseases<br>7400 Merton Minter Blvd., (111E)<br>San Antonio, TX 78229 United States                                     | University of Texas Health Science Center<br>7703 Floyd Curl Drive, Mail Code 7830<br>San Antonio, TX 78229-3900                                                         |
| 077534/023146  | Rhode Island Hospital<br>Division of Pulmonary, Sleep & Critical Care<br>Medicine<br>593 Eddy Street, APC 7 <sup>th</sup> Floor<br>Providence, RI 02903 United States          | Lifespan Office of Research Administration<br>167 Point Street<br>Providence, RI 02903                                                                                   |
| 013075/023147  | Los Angeles Biomedical Research Institute at<br>Harbor-UCLA Medical Center<br>Rehab Clinical Trials Center<br>1124 W. Carson St., Bldg. J4<br>Torrance, CA 90502 United States | John F. Wolf, MD Human Subjects Committee<br>Los Angeles Biomedical Research Institute at<br>Harbor-UCLA Medical Center<br>1124 West Carson Street<br>Torrance, CA 90502 |
| 008578/023354. | St. Elizabeth's Medical Center<br>Pulmonary STN-3<br>736 Cambridge Street<br>Boston, MA 02135 Unites States                                                                    | Research/Human Subjects Committee<br>Caritas St. Elizabeth's Medical Center<br>Cambridge St., HOQ3<br>Boston, MA 02135                                                   |
| 021992/023148  | Pulmonary Associates of Richmond, Inc.<br>1000 Boulders Parkway, Suite 201<br>Richmond, VA 23225 United States                                                                 | Goodwyn Institution Review Board<br>9380 Main Street<br>Cincinnati, OH 45242                                                                                             |
| 010875/023149  | Pulmonary Associates, PA<br>1112 East McDowell Road<br>Phoenix, AZ 85006 United States                                                                                         | Goodwyn Institution Review Board<br>9380 Main Street<br>Cincinnati, OH 45242                                                                                             |
| 011553/023150  | Advances in Medicine<br>42362 Bob Hope Drive<br>Rancho Mirage, CA 92270 Unites States                                                                                          | Western International Review Board<br>3535 Seventh Ave SW<br>Olympia, WA 98508                                                                                           |
| 010094/023355  | Baylor Clinic-Baylor College of Medicine<br>6620 Main Street<br>Suite 11B, 16<br>Houston, TX 77030 United States                                                               | Baylor College of Medicine IRB<br>Clinical Research Studies<br>One Baylor Plaza, Mail stop 600D<br>Houston, TX 77030                                                     |
| 015497/023356  | Dartmouth-Hitchcock Medical Center<br>Pulmonary & Critical Care Center<br>One Medical Center Drive<br>Lebanon, NH 03756 Unites States                                          | Dartmouth-Hitchcock Medical Center<br>Committee for the Protection of Human<br>Subjects<br>11 Rope Ferry Road #6210<br>Hanover, NH 03755                                 |
| 008005/023357  | National Jewish Medical & Research Center<br>Weinberg Clinical Research Unit<br>1400 Jackson Street<br>Denver, CO 80206 United States                                          | National Jewish Medical & Research Center<br>IRB<br>1400 Jackson Street<br>Denver, CO 80206                                                                              |
| 009021/023358  | University of Nebraska Medical Center<br>Pulmonary Clinical Studies Unit<br>982465 Nebraska Medical Center<br>DRC II1022<br>Omaha, NE 68198 United States                      | University of Nebraska Medical Center IRB<br>Academic & Research Services Bldg. 3000<br>987830 Nebraska Medical Center<br>Omaha, NE 68198                                |
| 083482/023571  | Yale University School of Medicine<br>Internal Medicine/Pulmonary<br>1 Gilbert Street, TAC S 441<br>New Haven, CT 06520 United States                                          | Yale University School of Medicine<br>Human Investigation Committee<br>47 College Street, Suite 204<br>New Haven, CT 06520                                               |
| 015449/023359  | Mayo Clinic<br>Pulmonary Clinical Research Center<br>Lanmark 2-46<br>14 - 2 <sup>nd</sup> Street SW<br>Rochester, MN 55905 United States                                       | Mayo Foundation IRB<br>201 Building, Room 4-60<br>200 First Street SW<br>Rochester, MN 55905                                                                             |
| 080801/023389  | Creighton University Medical Center<br>Pulmonary & Critical Care Division<br>601 N. 30 <sup>th</sup> Street, Suite 3820<br>Omaha, NE 68131 United States                       | Creighton University Medical Center IRB<br>2500 California Plaza<br>Omaha, NE 68178                                                                                      |

|               |                                                                                                                                                     |                                                                                      |
|---------------|-----------------------------------------------------------------------------------------------------------------------------------------------------|--------------------------------------------------------------------------------------|
| 010532/023489 | University of Pittsburgh Medical Center<br>Emphysema Research Center<br>3471 5 <sup>th</sup> Ave., Suite 1211<br>Pittsburgh, PA 15213 United States | University of Pittsburgh IRB<br>3500 Fifth Ave, Ground Level<br>Pittsburgh, PA 15213 |
|---------------|-----------------------------------------------------------------------------------------------------------------------------------------------------|--------------------------------------------------------------------------------------|

|               |                                                                                                                                |                                                                                                                                            |
|---------------|--------------------------------------------------------------------------------------------------------------------------------|--------------------------------------------------------------------------------------------------------------------------------------------|
| 021093/023390 | Houston VA Medical Center<br>2002 Holcombe Blvd.<br>Pulmonary 111-1, Room 3C-220<br>Houston, TX 77030 United States            | Baylor College of Medicine IRB<br>Clinical Research Studies<br>One Baylor Plaza, Mail stop 600D<br>Houston, TX 77030                       |
| 008864/023392 | Midwest Chest Consultants, PC<br>330 First Capital Drive, Suite 470<br>St. Charles, MO 63301 United States                     | Goodwyn Institution Review Board<br>9380 Main Street<br>Cincinnati, OH 45242                                                               |
| 077533/023391 | Harvard University-Brigham & Women's<br>Hospital<br>Channing Laboratory<br>181 Longwood Ave.<br>Boston, MA 02115 United States | Brigham & Women's Hospital IRB<br>Partners Human Research Office<br>116 Huntington Ave, Suite 1002<br>Boston, MA 02116                     |
| 016586/023393 | University of Miami School of Medicine<br>1600 NW 10th Ave, #7064-A (R-47)<br>Miami, FL 33136                                  | Western International Review Board<br>3535 Seventh Ave SW<br>Olympia, WA 98508                                                             |
| 057745/023394 | Johns Hopkins Asthma & Allergy Center<br>5501 Hopkins Bayview Circle, Room 3B-58<br>Baltimore, MD 21224 United States          | John Hopkins School of Medicine<br>Office of Human Subject Research<br>1620 McElderry St., Reed Hall<br>Suite B 130<br>Baltimore, MD 21205 |
| 012252/023395 | St. Francis Hospital & Medical Center<br>Pulmonary Medicine<br>114 Woodland Street<br>Hartford, CT 06105 United States         | St. Francis Hospital & Medical Center IRB<br>Department of Research<br>114 Woodland St.<br>Hartford, CT 06105                              |
